# Supplementary material for: Establishment and Functional Characterization of Immortalized Rabbit Dermal Papilla Cell Lines
Source: Research Square preprint supplement (doi:10.21203/rs.3.rs-1105281/v1), 2021-12-07
Supplement: Supplementary file 1 [file 43369556888a17f30fa4bb89.docx]

**Table S1. Primer sequences used for sq-PCR.**

| Genes | Sequences (5’ to 3’) |
| --- | --- |
| SV40LT | F:AAGTTTAATGTGGCTATGGG |
| R:ACTGTGAATCAATGCCTGTT |
| α-SMA | F:CTTTGCTGTGACGCGTTCCT |
| R:AAACTCCCGTGACACCATCC |
| IGF1 | F:CCCTCTGCTTGCTCACCTT |
| R:GCTGGAGCCGTATCCTGTG |
| ALPL | F:GCACTCCCACTTTGTCTGGA |
| R:CTCGGGGGTTCTTCTTCAGG |
| FGF2 | F: GTGTGTGCAAACCGTTACCTT |
| R: TCGTTTCAGTGCCACATACCAG |
| BMP2 | F:GACTTCAACAGTGCCACC |
| R:TGCTGTAGCCAAATTCGT |
| TGFβ1 | F:CAGGTCCTTGCGGAAGTCAA |
| R:CTGGAACGGGCTCAACATCTA |
| KRT8 | F: TATCCACACCAAGACCACCAC |
| R: ACGGGTCTCGATCTTCTTCAC |
| GAPDH | F: TCACCATCTTCCAGGAGCGA  R: CACAATGCCGAAGTGGTCGT |

**Table S2 PCR reaction system.**

| Reagent | Volume(μl) |
| --- | --- |
| 2 × Taq Master Mix (Dye Plus)(vazyme) | 10 |
| cDNA | 1 |
| F(10μM) | 1 |
| R(10μM) | 1 |
| dH2O | 7 |

**Table S3 PCR conditions.**

| Tm(0C) | Time |  |
| --- | --- | --- |
| 950C | 5min | 35cycles |
| 950C | 30s |
| 600C | 30s |
| 720C | 1min |
| 720C | 5min |  |
| 40C | 5min |  |
