# Supplementary material for: Establishment and Functional Characterization of Immortalized Rabbit Dermal Papilla Cell Lines
Source: Research Square preprint supplement (doi:10.21203/rs.3.rs-1105281/v1), 2021-12-07
Supplement: Supplementary file 3 [file fb9e8150470073ce81254769.docx]

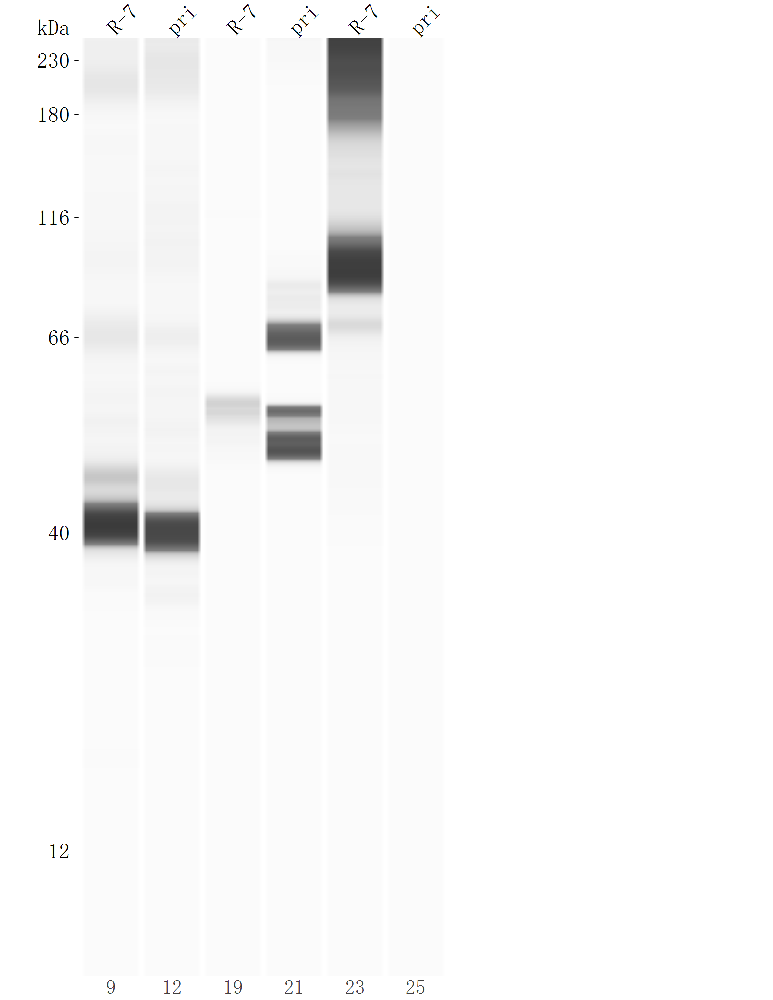


The original export map of the first wes experiment. The antibodies from left to right are GAPDH, GAPDH，VIM，VIM，SV40LT，SV40LT.


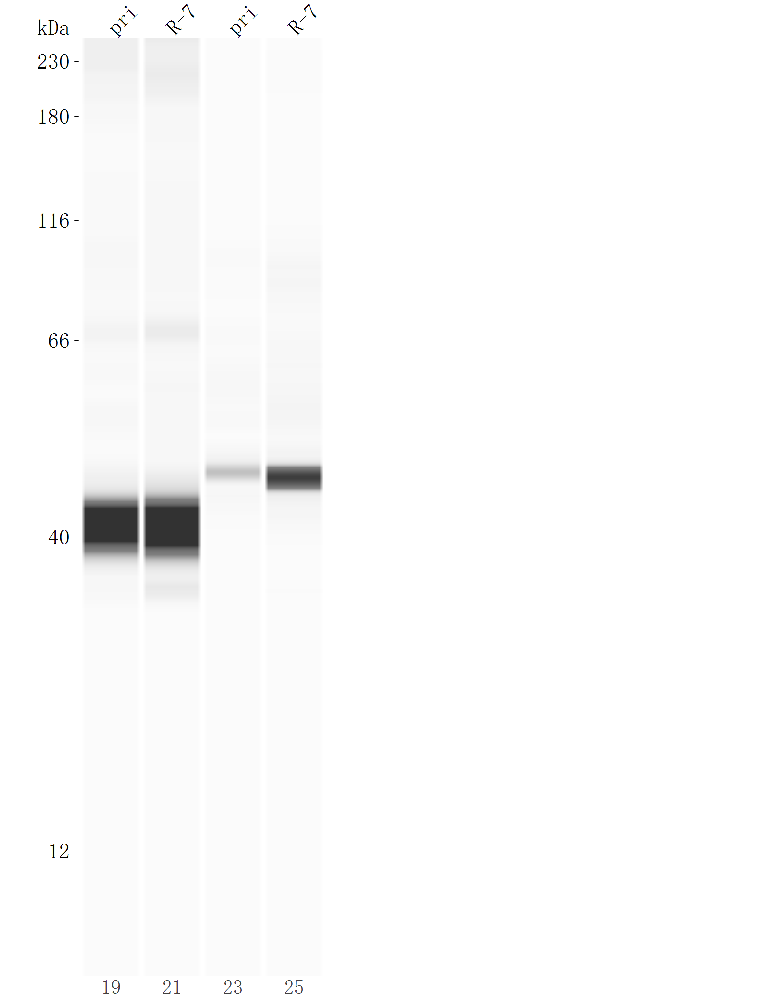


The original export map of the second wes experiment. The antibodies from left to right are GAPDH, GAPDH，α-SMA，α-SMA.
